# Supplementary material for: Malaria in French Guiana Linked to Illegal Gold Mining
Source: PubMed Central journal article supplement (PMC4734546; doi:10.3201/eid2202.151292), 2016-02
Supplement: 15-1292-Techapp-s1.pdf [file 15-1292-Techapp-s1.pdf]

# Malaria in French Guiana Linked to Illegal Gold Mining

## Technical Appendix

**Technical Appendix Table.** Distribution of mosquitoes sampled by sampling sites and *Plasmodium* infection rates of the 374 *Anopheles* mosquitoes caught in the French Guiana forest, 2013

| <i>Anopheles</i> species     | Dagobert*                     |                                                             |                      | Eau Claire†                   |                                                             |                      |
|------------------------------|-------------------------------|-------------------------------------------------------------|----------------------|-------------------------------|-------------------------------------------------------------|----------------------|
|                              | Collected mosquitoes, no. (%) | <i>Plasmodium</i> species, no. infected (infection rate, %) |                      | Collected mosquitoes, no. (%) | <i>Plasmodium</i> species, no. infected (infection rate, %) |                      |
|                              |                               | <i>P. vivax</i>                                             | <i>P. falciparum</i> |                               | <i>P. vivax</i>                                             | <i>P. falciparum</i> |
| <i>An. darlingi</i>          | 282 (87.8)                    | 1 (0.4)                                                     | –                    | 2 (4.0)                       | 0                                                           | 0                    |
| <i>An. nuneztovari</i> s.l.  | 17 (5.3)                      | 0                                                           | –                    | 19 (36.0)                     | 1 (5.0%)                                                    | 1 (5.0)              |
| <i>An. triannulatus</i> s.l. | 7 (2.2)                       | 0                                                           | –                    | 24 (45.0)                     | 0                                                           | 0                    |
| <i>A. ininii</i>             | 1 (0.3)                       | 0                                                           | –                    | 8 (15.0)                      | 0                                                           | 1 (12.5)             |
| <i>An. spp.</i> ‡            | 14 (4.4)                      | 0                                                           | –                    | 0                             | 0                                                           | 0                    |
| Total                        | 321 (100.0)                   | 1 (0.3)                                                     | –                    | 53 (100.0)                    | 1 (2.0)                                                     | 2 (4.0)              |

\*Human-baited landing 3 months after a malaria outbreak among French military personnel.

†*Anopheles* mosquitoes sampling 1 month before a malaria outbreak among French military personnel.

‡Species unidentified by morphologic or molecular tests.
